# Supplementary material for: Ordered mesoporous NiCoMnO4: synthesis and application in energy storage and catalytic decomposition of N2O
Source: Royal Society of Chemistry journal article supplement (doi:10.1039/c2jm31644g), 2012-01-01
Supplement: c2jm31644g.pdf [file c2jm31644g.pdf]

## Electronic Supplementary Information

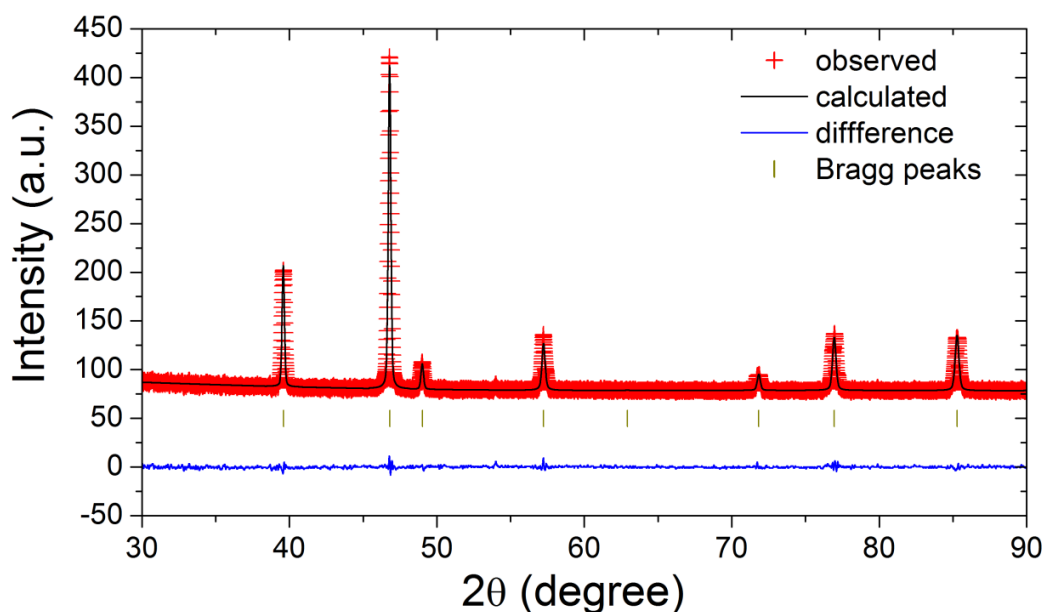

Fig. S1 Rietveld refinement of the XRD pattern of bulk  $\text{Co}_3\text{O}_4$  with spinel structure.

**Table S1:** Crystallographic data for bulk  $\text{Co}_3\text{O}_4$  after Rietveld refinement:

$\text{Fd-3m}$ ,  $a = 8.08419(6) \text{ \AA}$ ,  $V = 528.335(7) \text{ \AA}^3$ .

| Atom | x/a         | y/b         | z/c         | multi | occupancy |
|------|-------------|-------------|-------------|-------|-----------|
| Co1  | 0.625       | 0.625       | 0.625       | 8     | 1.000     |
| Co2  | 0.000       | 0.000       | 0.000       | 16    | 1.000     |
| O3   | 0.26504(27) | 0.26504(27) | 0.26504(27) | 32    | 1.000     |

$R_{\text{wp}} = 10.41\%$ ,  $R_{\text{p}} = 8.27\%$ ,

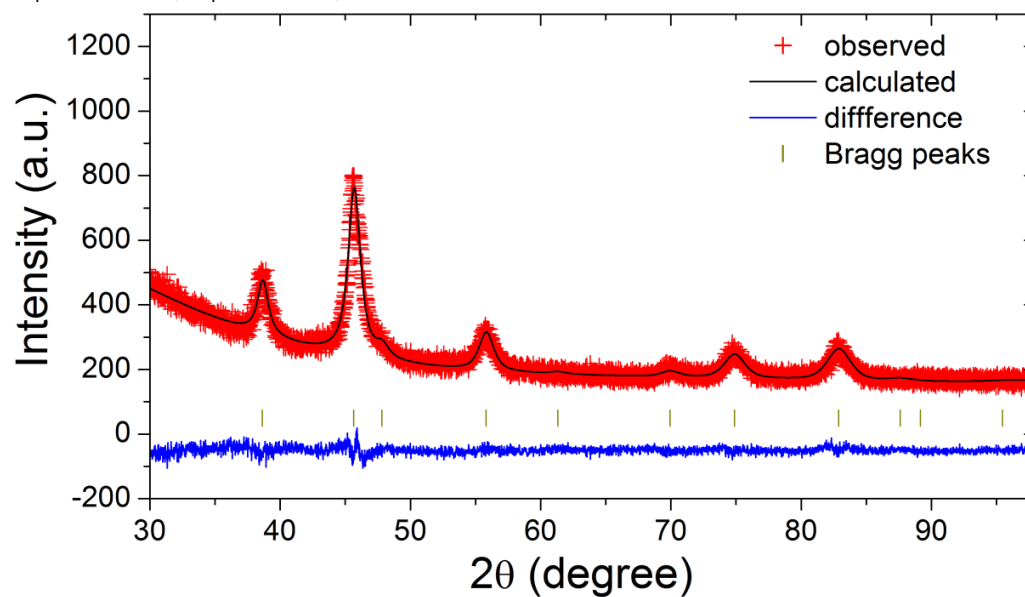

Fig. S2 Rietveld refinement of the XRD pattern of m-NiCoMnO<sub>4</sub>-700.

**Table S2:** Crystallographic data for m-NiCoMnO<sub>4</sub>-700 after Rietveld refinement:  
Fd-3m,  $a = b = c = 8.281(3)$  Å,  $V = 567.9(6)$  Å<sup>3</sup>.

| Atom | x/a       | y/b       | z/c       | multi | occupancy |
|------|-----------|-----------|-----------|-------|-----------|
| Ni1  | 0.625     | 0.625     | 0.625     | 8     | 1.000     |
| Mn2  | 0.000     | 0.000     | 0.000     | 16    | 0.500     |
| Co3  | 0.000     | 0.000     | 0.000     | 16    | 0.500     |
| O4   | 0.2558(8) | 0.2558(8) | 0.2558(8) | 32    | 1.000     |

$R_{wp} = 8.59\%$ ,  $R_p = 6.30\%$

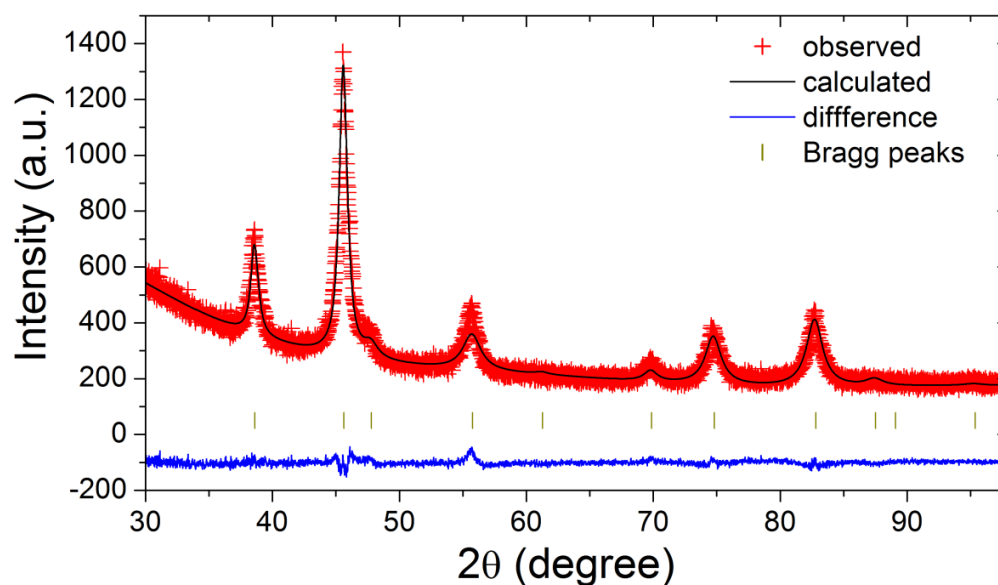

Fig. S3 Rietveld refinement of the XRD pattern of m-NiCoMnO<sub>4</sub>-800.

**Table S3:** Crystallographic data for m-NiCoMnO<sub>4</sub>-800 after Rietveld refinement:  
Fd-3m,  $a = b = c = 8.2819(16)$  Å,  $V = 568.06(19)$  Å<sup>3</sup>.

| Atom | x/a       | y/b       | z/c       | multi | occupancy |
|------|-----------|-----------|-----------|-------|-----------|
| Ni1  | 0.625     | 0.625     | 0.625     | 8     | 1.000     |
| Mn2  | 0.000     | 0.000     | 0.000     | 16    | 0.500     |
| Co3  | 0.000     | 0.000     | 0.000     | 16    | 0.500     |
| O4   | 0.2591(7) | 0.2591(7) | 0.2591(7) | 32    | 1.000     |

R-factors:  $R_{wp} = 8.33\%$ ,  $R_p = 6.20\%$ .

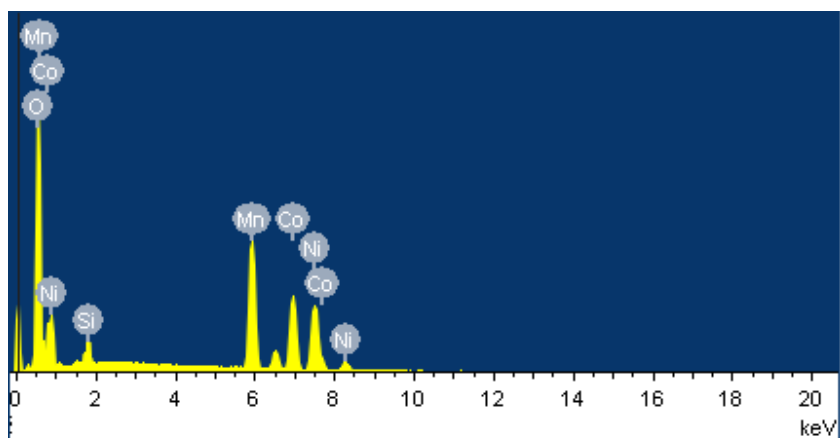

Fig. S4 EDX spectrum of m-NiCoMnO<sub>4</sub>-800

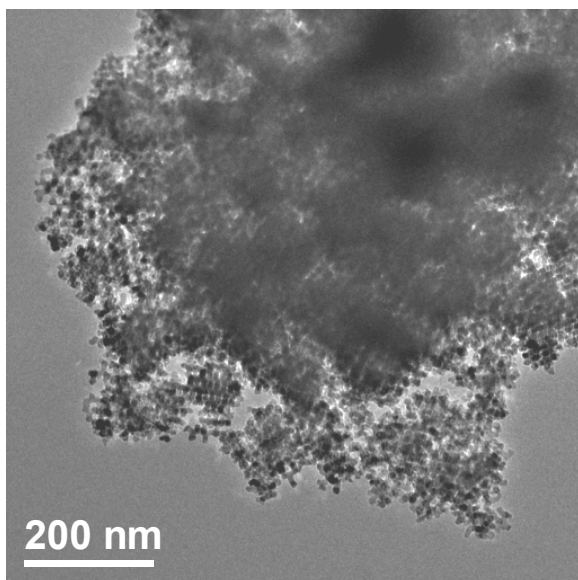

Fig. S5 Typical TEM image of m-LiNi<sub>1/3</sub>Co<sub>1/3</sub>Mn<sub>1/3</sub>O<sub>2</sub> with low magnification

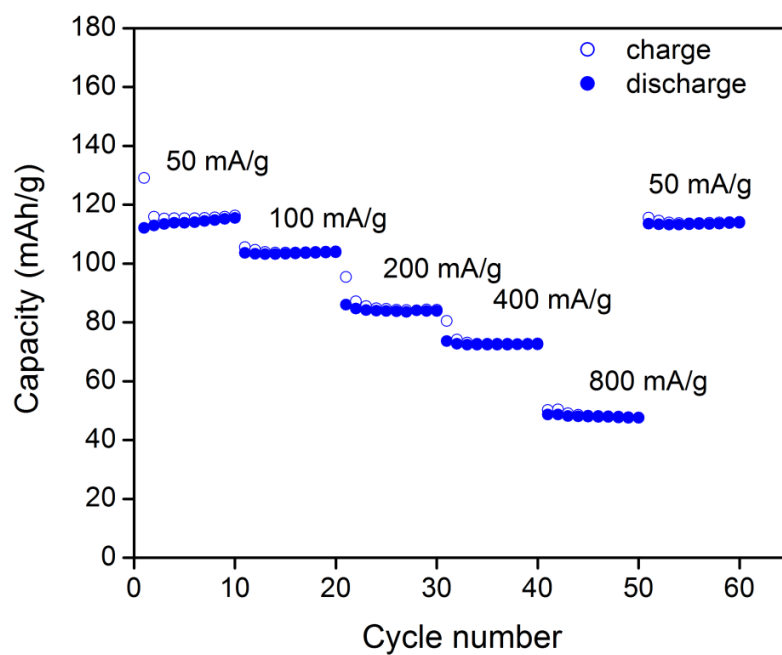

Fig. S6 Rate capability of  $m\text{-LiNi}_{1/3}\text{Co}_{1/3}\text{Mn}_{1/3}\text{O}_2$ .
